# Supplementary material for: You Want it Sweeter: How Glycosylation Affects Plant Response to Oxidative Stress
Source: Front Plant Sci. 2020 Sep 16;11:571399. doi: 10.3389/fpls.2020.571399 (PMC7525049; doi:10.3389/fpls.2020.571399)
Supplement: Supplementary file 1 [file Table_1.xlsx]

## Sheet: S1A
Gene ontology enrichment analysis of genes upregulated by ABA in Goda et al., 2008
Analysis Type:	PANTHER Overrepresentation Test (Released 20200407)
Annotation Version and Release Date:	GO Ontology database Released 2020-02-21
Analyzed List:	upload_1 (Arabidopsis thaliana)
Reference List:	Arabidopsis thaliana (all genes in database)
Test Type:	FISHER
Correction:	BONFERRONI
Bonferroni count:	2822
GO biological process complete	Arabidopsis thaliana - REFLIST (27416)	upload_1 (362)	upload_1 (expected)	upload_1 (over/under)	upload_1 (fold Enrichment)	upload_1 (P-value)
suberin biosynthetic process (GO:0010345)	19	6	.25	+	23.92	1.91E-03
response to mannitol (GO:0010555)	18	5	.24	+	21.04	2.86E-02
response to water deprivation (GO:0009414)	347	58	4.58	+	12.66	2.54E-39
response to water (GO:0009415)	355	58	4.69	+	12.37	7.90E-39
negative regulation of abscisic acid-activated signaling pathway (GO:0009788)	50	8	.66	+	12.12	2.36E-03
negative regulation of cellular response to alcohol (GO:1905958)	50	8	.66	+	12.12	2.36E-03
negative regulation of response to alcohol (GO:1901420)	50	8	.66	+	12.12	2.36E-03
regulation of abscisic acid-activated signaling pathway (GO:0009787)	105	13	1.39	+	9.38	1.45E-05
regulation of cellular response to alcohol (GO:1905957)	105	13	1.39	+	9.38	1.45E-05
regulation of response to alcohol (GO:1901419)	105	13	1.39	+	9.38	1.45E-05
response to abscisic acid (GO:0009737)	535	59	7.06	+	8.35	5.94E-31
phenylpropanoid biosynthetic process (GO:0009699)	91	10	1.20	+	8.32	2.36E-03
response to alcohol (GO:0097305)	539	59	7.12	+	8.29	8.62E-31
leaf senescence (GO:0010150)	104	11	1.37	+	8.01	9.49E-04
plant organ senescence (GO:0090693)	110	11	1.45	+	7.57	1.59E-03
response to osmotic stress (GO:0006970)	509	47	6.72	+	6.99	5.78E-21
phenylpropanoid metabolic process (GO:0009698)	124	11	1.64	+	6.72	4.73E-03
aging (GO:0007568)	139	12	1.84	+	6.54	2.09E-03
response to salt stress (GO:0009651)	431	37	5.69	+	6.50	5.69E-15
response to lipid (GO:0033993)	730	61	9.64	+	6.33	5.90E-26
abscisic acid-activated signaling pathway (GO:0009738)	197	16	2.60	+	6.15	6.62E-05
cellular response to abscisic acid stimulus (GO:0071215)	224	18	2.96	+	6.09	1.02E-05
cellular response to alcohol (GO:0097306)	224	18	2.96	+	6.09	1.02E-05
response to acid chemical (GO:0001101)	1138	86	15.03	+	5.72	2.92E-35
response to carbohydrate (GO:0009743)	149	11	1.97	+	5.59	2.46E-02
response to inorganic substance (GO:0010035)	909	66	12.00	+	5.50	4.48E-25
secondary metabolite biosynthetic process (GO:0044550)	153	11	2.02	+	5.44	3.10E-02
response to wounding (GO:0009611)	211	14	2.79	+	5.03	4.86E-03
response to cold (GO:0009409)	403	26	5.32	+	4.89	3.09E-07
response to oxygen-containing compound (GO:1901700)	1534	95	20.25	+	4.69	7.76E-33
cellular response to hypoxia (GO:0071456)	235	14	3.10	+	4.51	1.58E-02
cellular response to oxygen levels (GO:0071453)	237	14	3.13	+	4.47	1.73E-02
cellular response to decreased oxygen levels (GO:0036294)	237	14	3.13	+	4.47	1.73E-02
response to temperature stimulus (GO:0009266)	593	33	7.83	+	4.21	3.75E-08
response to hypoxia (GO:0001666)	260	14	3.43	+	4.08	4.66E-02
cellular response to lipid (GO:0071396)	376	20	4.96	+	4.03	8.89E-04
cellular response to acid chemical (GO:0071229)	452	24	5.97	+	4.02	5.96E-05
response to abiotic stimulus (GO:0009628)	2075	105	27.40	+	3.83	1.18E-29
secondary metabolic process (GO:0019748)	327	16	4.32	+	3.71	3.67E-02
response to hormone (GO:0009725)	1538	74	20.31	+	3.64	3.42E-18
response to endogenous stimulus (GO:0009719)	1556	74	20.55	+	3.60	6.52E-18
response to oxidative stress (GO:0006979)	446	21	5.89	+	3.57	2.98E-03
response to organic substance (GO:0010033)	1888	83	24.93	+	3.33	1.74E-18
cellular response to oxygen-containing compound (GO:1901701)	611	25	8.07	+	3.10	3.32E-03
response to chemical (GO:0042221)	2883	116	38.07	+	3.05	1.01E-24
response to stress (GO:0006950)	3575	132	47.20	+	2.80	1.31E-25
cellular response to chemical stimulus (GO:0070887)	1431	47	18.89	+	2.49	5.18E-05
response to stimulus (GO:0050896)	6086	176	80.36	+	2.19	2.21E-24
Unclassified (UNCLASSIFIED)	4383	40	57.87	-	.69	0.00E00
cellular nitrogen compound metabolic process (GO:0034641)	3017	11	39.84	-	.28	1.05E-04
nucleobase-containing compound metabolic process (GO:0006139)	2168	6	28.63	-	.21	9.32E-04
gene expression (GO:0010467)	1655	3	21.85	-	.14	2.56E-03
RNA metabolic process (GO:0016070)	1348	2	17.80	-	.11	1.60E-02
nucleic acid metabolic process (GO:0090304)	1781	2	23.52	-	.09	4.87E-05

## Sheet: S1B
Gene ontology enrichment analysis of genes upregulated by ABA in Hoth et al., 2002
Analysis Type:	PANTHER Overrepresentation Test (Released 20200407)
Annotation Version and Release Date:	GO Ontology database Released 2020-02-21
Analyzed List:	upload_1 (Arabidopsis thaliana)
Reference List:	Arabidopsis thaliana (all genes in database)
Test Type:	FISHER
Correction:	BONFERRONI
Bonferroni count:	2822
GO biological process complete	Arabidopsis thaliana - REFLIST (27416)	upload_1 (666)	upload_1 (expected)	upload_1 (over/under)	upload_1 (fold Enrichment)	upload_1 (P-value)
defense response to insect (GO:0002213)	24	7	.58	+	12.01	1.85E-02
cold acclimation (GO:0009631)	56	10	1.36	+	7.35	9.47E-03
response to water deprivation (GO:0009414)	347	51	8.43	+	6.05	2.51E-19
response to water (GO:0009415)	355	51	8.62	+	5.91	6.24E-19
phenylpropanoid biosynthetic process (GO:0009699)	91	12	2.21	+	5.43	1.73E-02
phenylpropanoid metabolic process (GO:0009698)	124	14	3.01	+	4.65	1.55E-02
abscisic acid-activated signaling pathway (GO:0009738)	197	21	4.79	+	4.39	1.84E-04
response to abscisic acid (GO:0009737)	535	57	13.00	+	4.39	8.56E-16
response to alcohol (GO:0097305)	539	57	13.09	+	4.35	1.17E-15
secondary metabolite biosynthetic process (GO:0044550)	153	16	3.72	+	4.30	8.38E-03
response to wounding (GO:0009611)	211	22	5.13	+	4.29	1.28E-04
cellular response to abscisic acid stimulus (GO:0071215)	224	22	5.44	+	4.04	3.36E-04
cellular response to alcohol (GO:0097306)	224	22	5.44	+	4.04	3.36E-04
response to osmotic stress (GO:0006970)	509	45	12.36	+	3.64	2.48E-09
cellular response to hypoxia (GO:0071456)	235	19	5.71	+	3.33	3.33E-02
response to lipid (GO:0033993)	730	59	17.73	+	3.33	2.39E-11
response to inorganic substance (GO:0010035)	909	73	22.08	+	3.31	1.66E-14
cellular response to oxygen levels (GO:0071453)	237	19	5.76	+	3.30	3.72E-02
cellular response to decreased oxygen levels (GO:0036294)	237	19	5.76	+	3.30	3.72E-02
response to decreased oxygen levels (GO:0036293)	264	21	6.41	+	3.27	1.48E-02
response to oxygen levels (GO:0070482)	265	21	6.44	+	3.26	1.56E-02
response to salt stress (GO:0009651)	431	34	10.47	+	3.25	2.35E-05
cellular response to acid chemical (GO:0071229)	452	35	10.98	+	3.19	2.20E-05
response to acid chemical (GO:0001101)	1138	88	27.64	+	3.18	4.40E-17
response to hypoxia (GO:0001666)	260	20	6.32	+	3.17	3.89E-02
response to cold (GO:0009409)	403	30	9.79	+	3.06	5.73E-04
response to oxygen-containing compound (GO:1901700)	1534	102	37.26	+	2.74	7.60E-16
cellular response to lipid (GO:0071396)	376	25	9.13	+	2.74	3.70E-02
response to temperature stimulus (GO:0009266)	593	39	14.41	+	2.71	1.95E-04
cellular response to oxygen-containing compound (GO:1901701)	611	39	14.84	+	2.63	4.04E-04
response to hormone (GO:0009725)	1538	88	37.36	+	2.36	1.23E-09
response to endogenous stimulus (GO:0009719)	1556	89	37.80	+	2.35	8.90E-10
response to abiotic stimulus (GO:0009628)	2075	118	50.41	+	2.34	9.87E-14
response to organic substance (GO:0010033)	1888	96	45.86	+	2.09	6.11E-08
response to chemical (GO:0042221)	2883	146	70.03	+	2.08	1.35E-13
cellular response to chemical stimulus (GO:0070887)	1431	71	34.76	+	2.04	1.08E-04
response to stress (GO:0006950)	3575	161	86.85	+	1.85	4.87E-11
signal transduction (GO:0007165)	1711	74	41.56	+	1.78	1.03E-02
signaling (GO:0023052)	1745	74	42.39	+	1.75	1.87E-02
cellular response to stimulus (GO:0051716)	2863	119	69.55	+	1.71	3.22E-05
cell communication (GO:0007154)	1994	82	48.44	+	1.69	1.62E-02
response to stimulus (GO:0050896)	6086	239	147.84	+	1.62	6.87E-12
regulation of cellular process (GO:0050794)	4736	163	115.05	+	1.42	1.09E-02
biological regulation (GO:0065007)	6121	204	148.69	+	1.37	2.73E-03
regulation of biological process (GO:0050789)	5405	179	131.30	+	1.36	3.24E-02
cellular process (GO:0009987)	11711	349	284.49	+	1.23	2.37E-03
Unclassified (UNCLASSIFIED)	4383	90	106.47	-	.85	0.00E00

## Sheet: S1C
Gene ontology enrichment analysis of genes upregulated by auxin in Goda et al., 2008
Analysis Type:	PANTHER Overrepresentation Test (Released 20200407)
Annotation Version and Release Date:	GO Ontology database Released 2020-02-21
Analyzed List:	upload_1 (Arabidopsis thaliana)
Reference List:	Arabidopsis thaliana (all genes in database)
Test Type:	FISHER
Correction:	BONFERRONI
Bonferroni count:	2822
GO biological process complete	Arabidopsis thaliana - REFLIST (27416)	upload_1 (2469)	upload_1 (expected)	upload_1 (over/under)	upload_1 (fold Enrichment)	upload_1 (P-value)
photosynthesis, light harvesting in photosystem I (GO:0009768)	23	15	2.07	+	7.24	3.81E-04
water transport (GO:0006833)	29	18	2.61	+	6.89	3.77E-05
fluid transport (GO:0042044)	29	18	2.61	+	6.89	3.77E-05
photosynthesis, light harvesting (GO:0009765)	44	21	3.96	+	5.30	8.07E-05
response to far red light (GO:0010218)	51	20	4.59	+	4.35	2.10E-03
plant-type cell wall modification (GO:0009827)	62	21	5.58	+	3.76	7.64E-03
photosynthesis, light reaction (GO:0019684)	128	43	11.53	+	3.73	7.39E-08
plant-type secondary cell wall biogenesis (GO:0009834)	58	19	5.22	+	3.64	3.33E-02
auxin-activated signaling pathway (GO:0009734)	191	59	17.20	+	3.43	3.23E-10
cellular response to auxin stimulus (GO:0071365)	210	64	18.91	+	3.38	5.00E-11
response to red light (GO:0010114)	71	21	6.39	+	3.28	4.32E-02
photosynthesis (GO:0015979)	233	66	20.98	+	3.15	3.43E-10
response to auxin (GO:0009733)	376	98	33.86	+	2.89	4.81E-14
plant-type cell wall organization (GO:0009664)	140	32	12.61	+	2.54	4.84E-02
response to red or far red light (GO:0009639)	212	46	19.09	+	2.41	1.75E-03
plant-type cell wall organization or biogenesis (GO:0071669)	250	54	22.51	+	2.40	2.34E-04
cell wall biogenesis (GO:0042546)	230	47	20.71	+	2.27	7.17E-03
cell wall organization (GO:0071555)	537	101	48.36	+	2.09	6.33E-07
cell wall organization or biogenesis (GO:0071554)	672	126	60.52	+	2.08	4.17E-09
regulation of growth (GO:0040008)	317	59	28.55	+	2.07	4.98E-03
cellular polysaccharide metabolic process (GO:0044264)	284	52	25.58	+	2.03	3.85E-02
external encapsulating structure organization (GO:0045229)	575	103	51.78	+	1.99	5.38E-06
polysaccharide metabolic process (GO:0005976)	443	77	39.90	+	1.93	1.99E-03
hormone-mediated signaling pathway (GO:0009755)	809	137	72.86	+	1.88	2.50E-07
cellular carbohydrate metabolic process (GO:0044262)	406	68	36.56	+	1.86	2.79E-02
cellular response to hormone stimulus (GO:0032870)	893	146	80.42	+	1.82	5.49E-07
cellular response to endogenous stimulus (GO:0071495)	912	148	82.13	+	1.80	5.93E-07
response to light stimulus (GO:0009416)	702	113	63.22	+	1.79	1.35E-04
response to hormone (GO:0009725)	1538	242	138.51	+	1.75	1.37E-11
response to endogenous stimulus (GO:0009719)	1556	244	140.13	+	1.74	1.38E-11
response to radiation (GO:0009314)	727	114	65.47	+	1.74	4.31E-04
cellular response to organic substance (GO:0071310)	1021	155	91.95	+	1.69	1.64E-05
response to organic substance (GO:0010033)	1888	273	170.03	+	1.61	1.50E-09
cellular developmental process (GO:0048869)	918	130	82.67	+	1.57	9.36E-03
carbohydrate metabolic process (GO:0005975)	993	140	89.43	+	1.57	4.28E-03
lipid metabolic process (GO:0006629)	973	133	87.63	+	1.52	3.67E-02
cellular response to chemical stimulus (GO:0070887)	1431	185	128.87	+	1.44	1.40E-02
response to oxygen-containing compound (GO:1901700)	1534	198	138.15	+	1.43	6.28E-03
response to chemical (GO:0042221)	2883	367	259.63	+	1.41	5.55E-07
signal transduction (GO:0007165)	1711	217	154.09	+	1.41	6.74E-03
signaling (GO:0023052)	1745	220	157.15	+	1.40	8.27E-03
cell communication (GO:0007154)	1994	248	179.57	+	1.38	4.52E-03
response to abiotic stimulus (GO:0009628)	2075	254	186.87	+	1.36	1.01E-02
developmental process (GO:0032502)	3202	370	288.36	+	1.28	7.23E-03
anatomical structure development (GO:0048856)	3023	347	272.24	+	1.27	2.74E-02
response to stimulus (GO:0050896)	6086	688	548.09	+	1.26	8.03E-07
Unclassified (UNCLASSIFIED)	4383	351	394.72	-	.89	0.00E00
organic cyclic compound metabolic process (GO:1901360)	2702	177	243.33	-	.73	2.33E-02
heterocycle metabolic process (GO:0046483)	2470	154	222.44	-	.69	3.76E-03
cellular aromatic compound metabolic process (GO:0006725)	2602	159	234.33	-	.68	5.61E-04
cellular nitrogen compound metabolic process (GO:0034641)	3017	172	271.70	-	.63	1.98E-07
nucleobase-containing compound metabolic process (GO:0006139)	2168	116	195.24	-	.59	3.55E-06
nucleic acid metabolic process (GO:0090304)	1781	84	160.39	-	.52	2.16E-07
protein transport (GO:0015031)	793	37	71.42	-	.52	4.75E-02
intracellular transport (GO:0046907)	732	32	65.92	-	.49	2.78E-02
amide biosynthetic process (GO:0043604)	643	26	57.91	-	.45	1.91E-02
gene expression (GO:0010467)	1655	56	149.04	-	.38	2.50E-14
peptide metabolic process (GO:0006518)	653	22	58.81	-	.37	3.67E-04
RNA metabolic process (GO:0016070)	1348	44	121.40	-	.36	7.42E-12
ubiquitin-dependent protein catabolic process (GO:0006511)	486	15	43.77	-	.34	4.64E-03
modification-dependent protein catabolic process (GO:0019941)	499	15	44.94	-	.33	2.64E-03
modification-dependent macromolecule catabolic process (GO:0043632)	511	15	46.02	-	.33	1.04E-03
peptide biosynthetic process (GO:0043043)	571	16	51.42	-	.31	9.68E-05
RNA modification (GO:0009451)	362	10	32.60	-	.31	3.08E-02
translation (GO:0006412)	566	15	50.97	-	.29	3.50E-05
ncRNA metabolic process (GO:0034660)	428	11	38.54	-	.29	2.03E-03
ribosome biogenesis (GO:0042254)	367	9	33.05	-	.27	8.06E-03
mRNA metabolic process (GO:0016071)	513	12	46.20	-	.26	2.51E-05
ncRNA processing (GO:0034470)	362	8	32.60	-	.25	2.64E-03
RNA processing (GO:0006396)	833	18	75.02	-	.24	6.06E-11
ribonucleoprotein complex biogenesis (GO:0022613)	441	9	39.72	-	.23	5.78E-05
mRNA processing (GO:0006397)	402	8	36.20	-	.22	1.82E-04
response to hypoxia (GO:0001666)	260	5	23.41	-	.21	4.36E-02
response to decreased oxygen levels (GO:0036293)	264	5	23.78	-	.21	3.10E-02
response to oxygen levels (GO:0070482)	265	5	23.87	-	.21	3.10E-02
RNA splicing (GO:0008380)	284	3	25.58	-	.12	3.22E-04
cellular response to hypoxia (GO:0071456)	235	2	21.16	-	.09	1.74E-03
cellular response to oxygen levels (GO:0071453)	237	2	21.34	-	.09	1.17E-03
cellular response to decreased oxygen levels (GO:0036294)	237	2	21.34	-	.09	1.17E-03

## Sheet: S1D
Gene ontology enrichment analysis of genes upregulated by auxin in Lewis et al., 2013
Analysis Type:	PANTHER Overrepresentation Test (Released 20200407)
Annotation Version and Release Date:	GO Ontology database Released 2020-02-21
Analyzed List:	upload_1 (Arabidopsis thaliana)
Reference List:	Arabidopsis thaliana (all genes in database)
Test Type:	FISHER
Correction:	BONFERRONI
Bonferroni count:	2822
GO biological process complete	Arabidopsis thaliana - REFLIST (27416)	upload_1 (561)	upload_1 (expected)	upload_1 (over/under)	upload_1 (fold Enrichment)	upload_1 (P-value)
endonucleolytic cleavage involved in rRNA processing (GO:0000478)	11	5	.23	+	22.21	3.27E-02
maturation of LSU-rRNA from tricistronic rRNA transcript (SSU-rRNA, 5.8S rRNA, LSU-rRNA) (GO:0000463)	18	7	.37	+	19.00	1.25E-03
cleavage involved in rRNA processing (GO:0000469)	25	8	.51	+	15.64	6.27E-04
maturation of 5.8S rRNA (GO:0000460)	32	10	.65	+	15.27	2.26E-05
maturation of LSU-rRNA (GO:0000470)	46	14	.94	+	14.87	3.04E-08
RNA phosphodiester bond hydrolysis, endonucleolytic (GO:0090502)	20	6	.41	+	14.66	2.92E-02
maturation of 5.8S rRNA from tricistronic rRNA transcript (SSU-rRNA, 5.8S rRNA, LSU-rRNA) (GO:0000466)	20	6	.41	+	14.66	2.92E-02
ribosomal large subunit biogenesis (GO:0042273)	107	31	2.19	+	14.16	2.70E-20
maturation of SSU-rRNA (GO:0030490)	53	15	1.08	+	13.83	1.33E-08
maturation of SSU-rRNA from tricistronic rRNA transcript (SSU-rRNA, 5.8S rRNA, LSU-rRNA) (GO:0000462)	36	10	.74	+	13.57	5.84E-05
rRNA processing (GO:0006364)	248	60	5.07	+	11.82	9.54E-38
rRNA metabolic process (GO:0016072)	254	60	5.20	+	11.54	3.09E-37
RNA phosphodiester bond hydrolysis (GO:0090501)	46	10	.94	+	10.62	4.26E-04
ribosome biogenesis (GO:0042254)	367	78	7.51	+	10.39	1.83E-46
ribosomal large subunit assembly (GO:0000027)	43	9	.88	+	10.23	2.37E-03
ribosomal small subunit biogenesis (GO:0042274)	88	18	1.80	+	10.00	1.12E-08
nucleoside monophosphate biosynthetic process (GO:0009124)	47	9	.96	+	9.36	4.54E-03
nucleoside monophosphate metabolic process (GO:0009123)	48	9	.98	+	9.16	5.30E-03
ribonucleoprotein complex biogenesis (GO:0022613)	441	81	9.02	+	8.98	3.57E-44
ncRNA processing (GO:0034470)	362	65	7.41	+	8.77	3.07E-34
ncRNA metabolic process (GO:0034660)	428	68	8.76	+	7.76	5.18E-33
auxin polar transport (GO:0009926)	61	9	1.25	+	7.21	3.04E-02
ribosome assembly (GO:0042255)	86	12	1.76	+	6.82	1.80E-03
nucleic acid phosphodiester bond hydrolysis (GO:0090305)	81	10	1.66	+	6.03	4.11E-02
meristem maintenance (GO:0010073)	134	14	2.74	+	5.11	5.14E-03
embryo sac development (GO:0009553)	144	14	2.95	+	4.75	1.11E-02
ribonucleoprotein complex assembly (GO:0022618)	157	15	3.21	+	4.67	6.18E-03
ribonucleoprotein complex subunit organization (GO:0071826)	160	15	3.27	+	4.58	7.67E-03
RNA processing (GO:0006396)	833	76	17.05	+	4.46	9.44E-23
cellular component biogenesis (GO:0044085)	1257	98	25.72	+	3.81	2.35E-25
meristem development (GO:0048507)	206	16	4.22	+	3.80	3.35E-02
cellular response to auxin stimulus (GO:0071365)	210	16	4.30	+	3.72	4.18E-02
RNA metabolic process (GO:0016070)	1348	90	27.58	+	3.26	1.35E-18
gene expression (GO:0010467)	1655	106	33.87	+	3.13	3.08E-21
nucleic acid metabolic process (GO:0090304)	1781	102	36.44	+	2.80	6.69E-17
nucleobase-containing compound metabolic process (GO:0006139)	2168	118	44.36	+	2.66	1.85E-18
heterocycle metabolic process (GO:0046483)	2470	126	50.54	+	2.49	1.56E-17
organic cyclic compound metabolic process (GO:1901360)	2702	131	55.29	+	2.37	1.02E-16
cellular aromatic compound metabolic process (GO:0006725)	2602	126	53.24	+	2.37	7.49E-16
cellular nitrogen compound metabolic process (GO:0034641)	3017	143	61.74	+	2.32	8.87E-18
cellular component organization or biogenesis (GO:0071840)	3161	134	64.68	+	2.07	1.64E-12
cellular nitrogen compound biosynthetic process (GO:0044271)	1249	50	25.56	+	1.96	3.00E-02
macromolecule metabolic process (GO:0043170)	5757	191	117.80	+	1.62	4.89E-09
nitrogen compound metabolic process (GO:0006807)	6439	211	131.76	+	1.60	4.21E-10
primary metabolic process (GO:0044238)	7594	242	155.39	+	1.56	3.19E-11
organic substance metabolic process (GO:0071704)	8275	254	169.33	+	1.50	3.09E-10
cellular metabolic process (GO:0044237)	8019	240	164.09	+	1.46	4.76E-08
metabolic process (GO:0008152)	9625	274	196.95	+	1.39	1.20E-07
cellular process (GO:0009987)	11711	327	239.64	+	1.36	8.64E-10
Unclassified (UNCLASSIFIED)	4383	70	89.69	-	.78	0.00E00
